# Supplementary material for: INSL3 Variation in Dogs Following Suppression and Recovery of the HPG Axis
Source: MDPI journal article supplement (doi:10.3390/ani14050675), 2024-02-21

## Supplemental

### ***Supplemental Figure S1***

**A.** Serial dilution of sera from two fetal calves and two male dogs, to indicate assay parallelism. **B.** Titration curve for the Eu<sup>3+</sup>-labelled tracer against pure canine INSL3 using the heterologous bovine INSL3 assay.

### ***Supplemental Figure S2***

Hormone profiles measured in blood samples collected at the indicated times from the cohort of German male Beagle dogs. **A.** Testosterone. **B.** LH. **C.** FSH. For details see [29].

## Supplemental Figure S1

A.

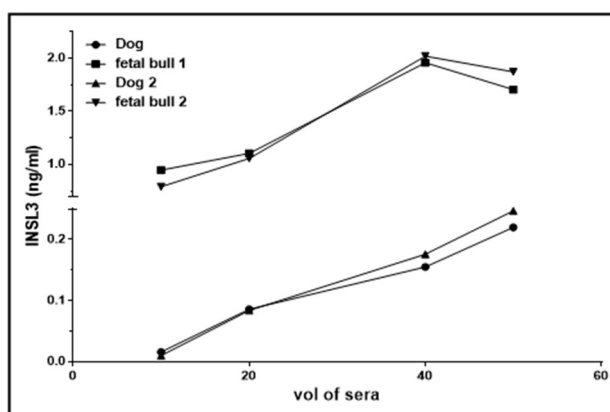

B.

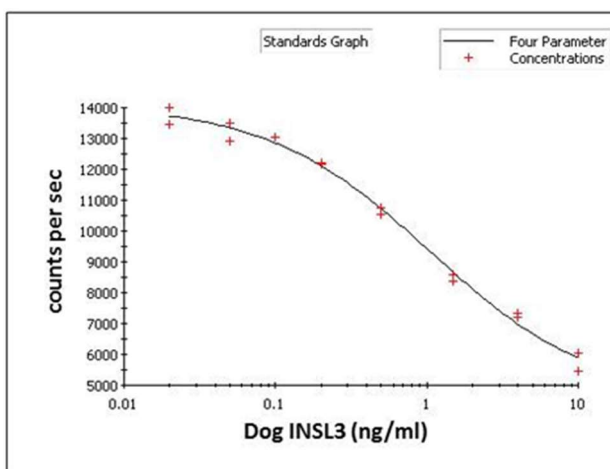

Supplemental Figure S2

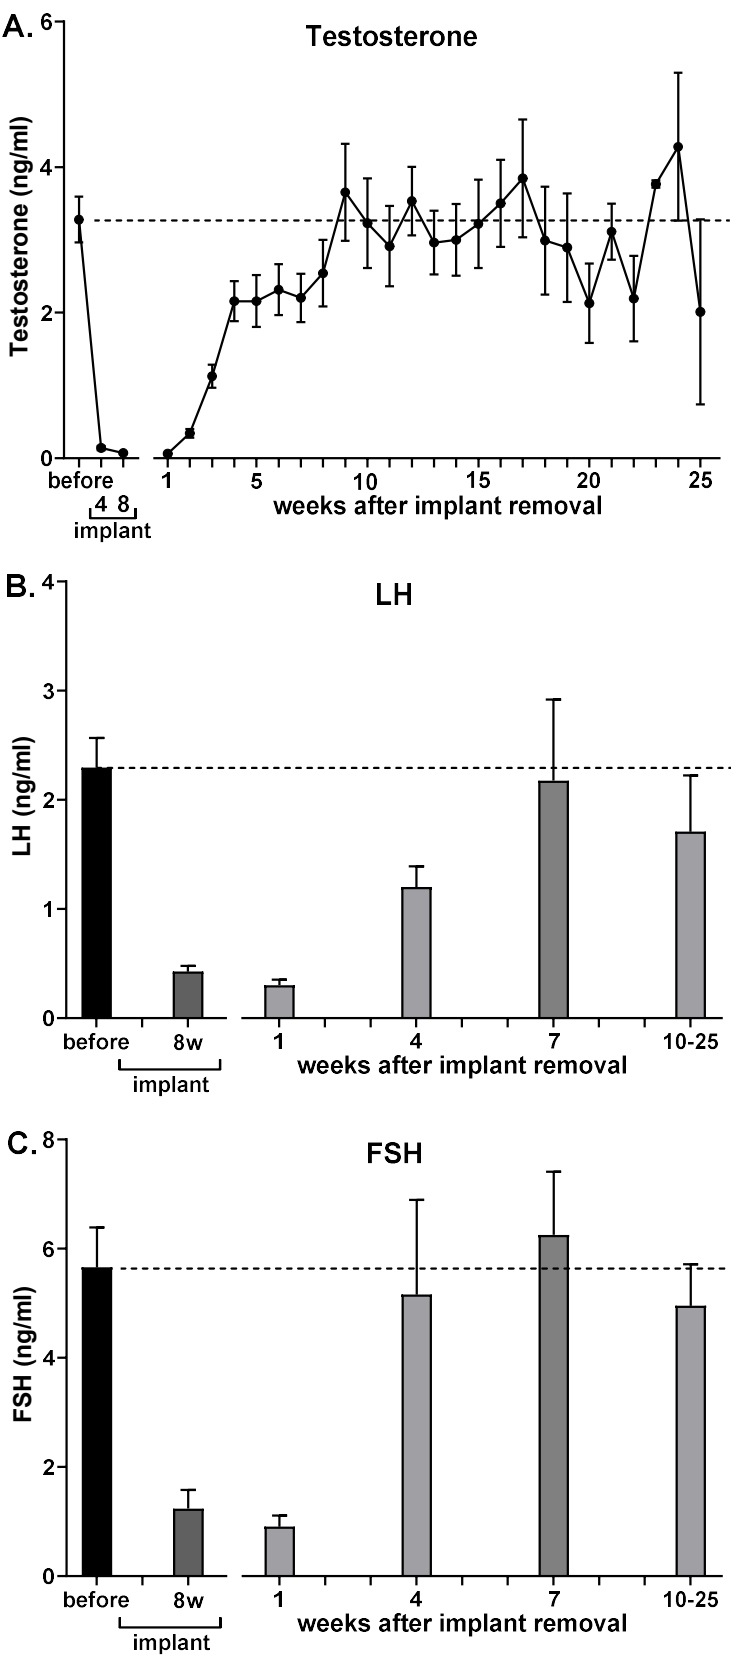

Supplement: s1 [file s1]
